# Supplementary material
Source: PubMed Central journal article supplement (PMC11481556)
Supplement: mbio.02360-24-s0001.pdf [file mbio.02360-24-s0001.pdf]

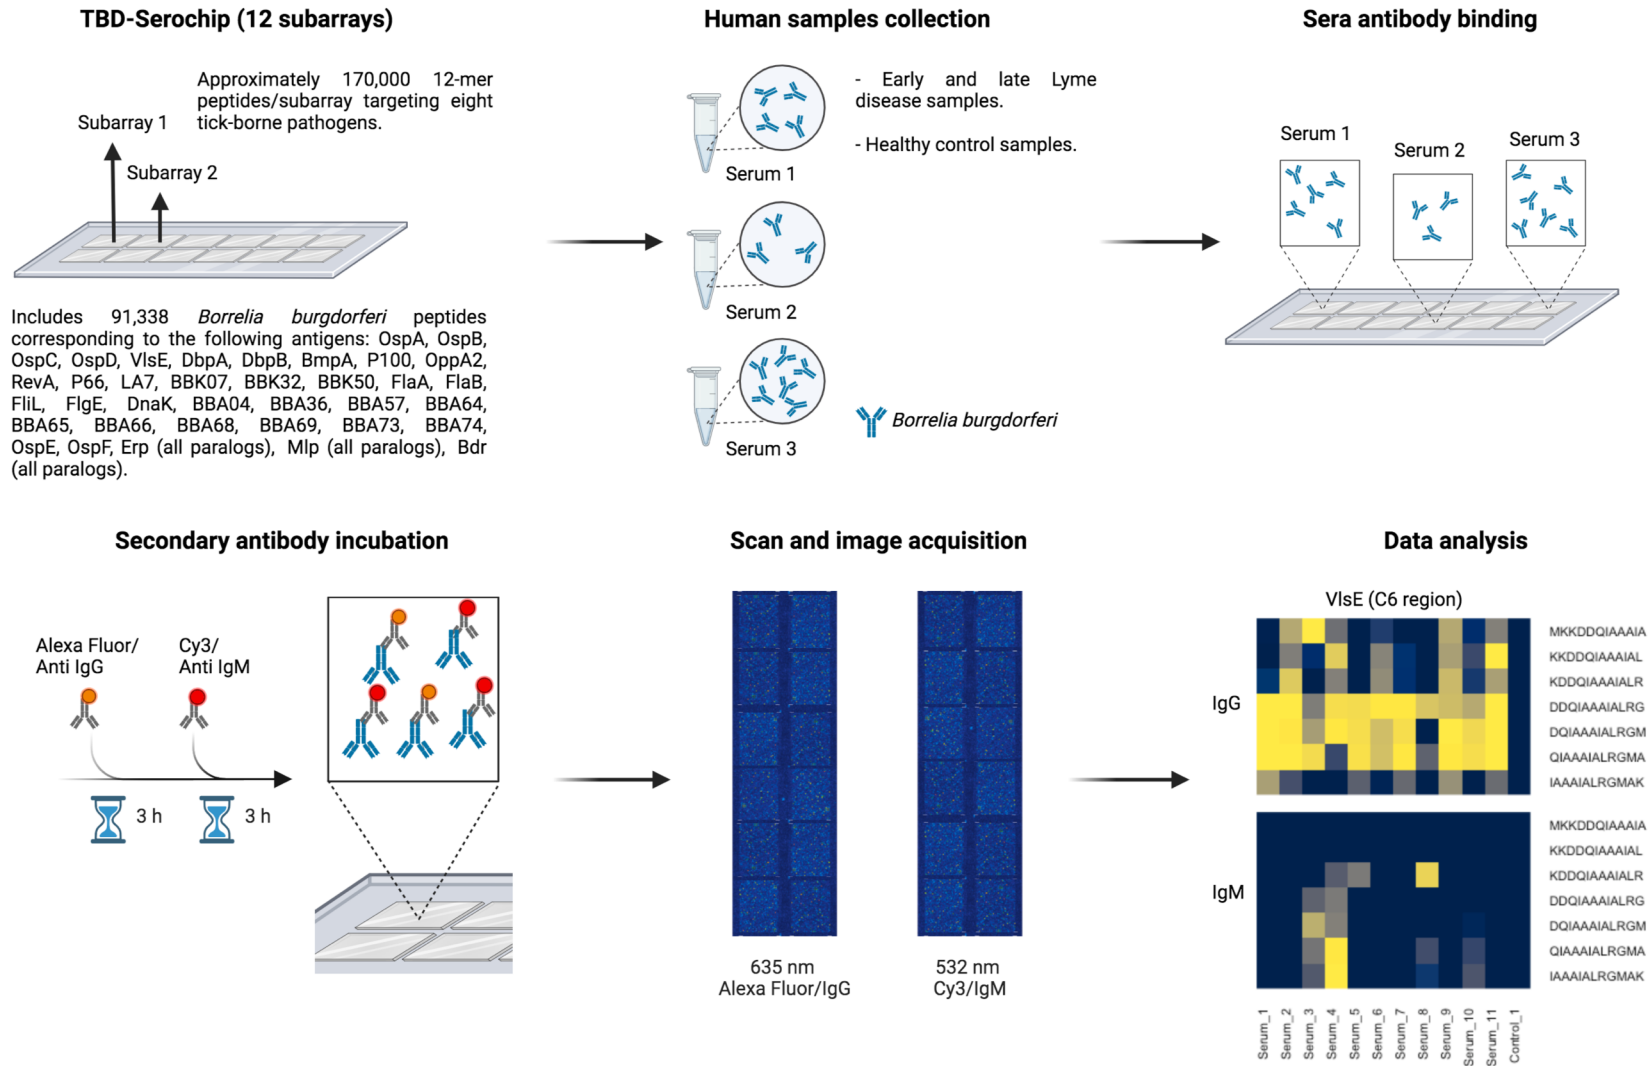

**Fig. S1.** Schematic for sera testing on the TBD-Serochip.

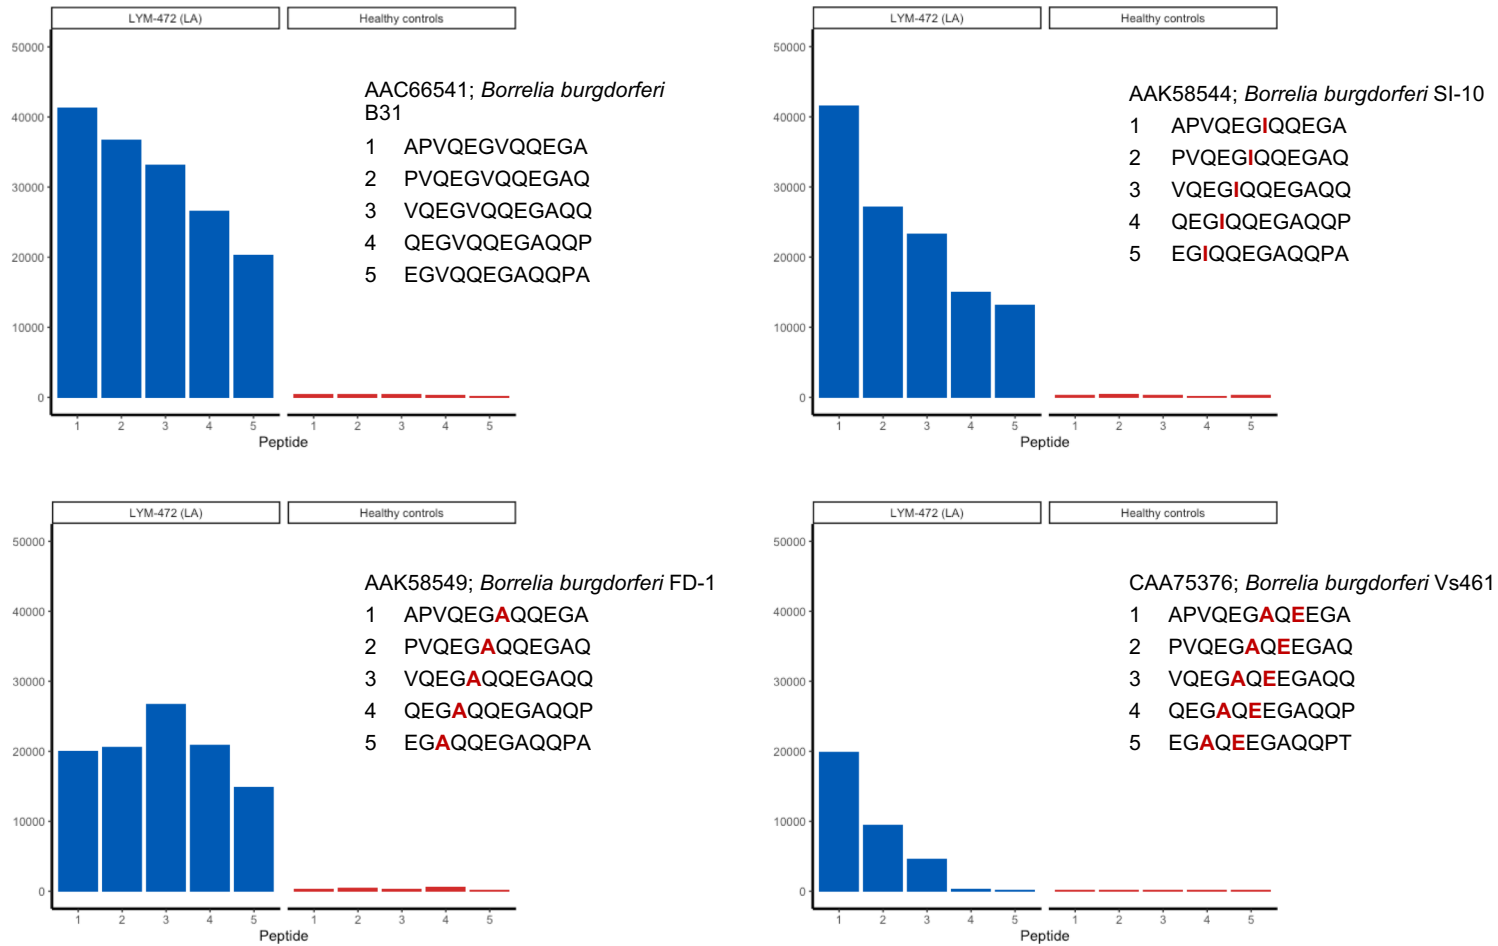

**Fig. S2.** Demonstration of amino acid heterogeneity of antibody binding on the TBD-Serochip. Shown is the reactivity to five FlaB peptides from the B31 strain and their variants from other *B. burgdorferi* strains. The blue bars represent the reactivity of a single Lyme disease positive serum from a patient with Lyme arthritis (LYM-472). The bars represent an average of 47 healthy control sera from the National Institutes of Health. The Y-axis indicates reactivity and the numbers 1-5 on the X-axis correspond to the peptide sequences. Substantial cross-reactivity can still be detected despite amino acid substitution at multiple positions (shown in red) within the 12-mer peptide.

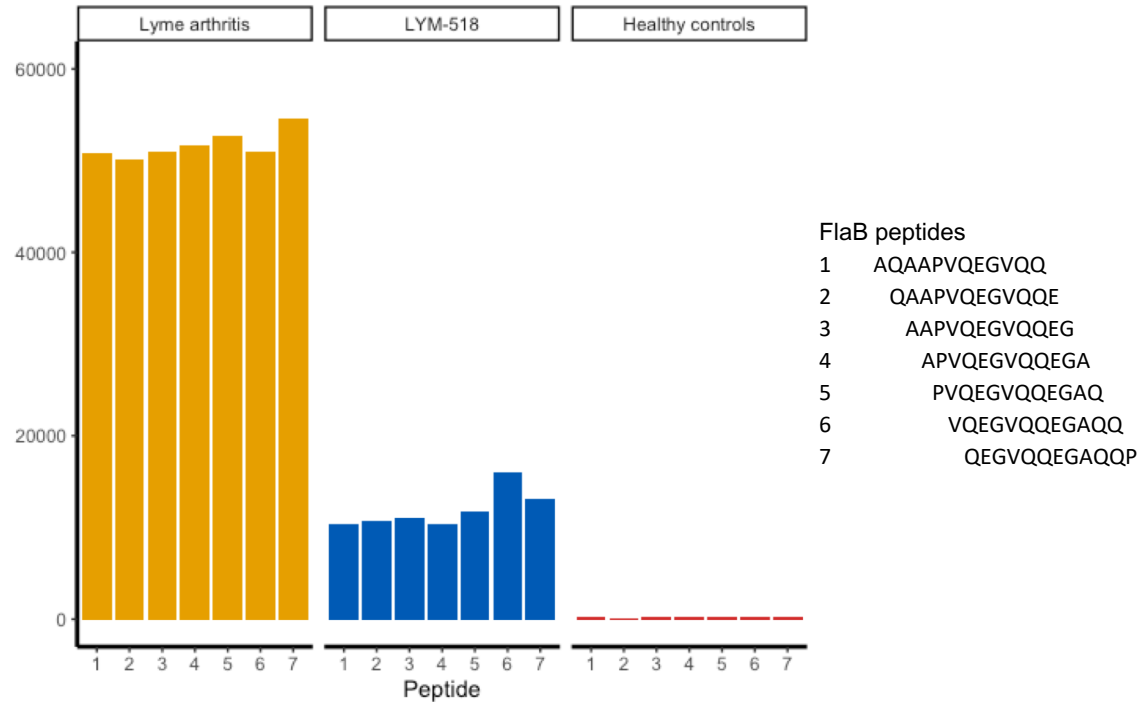

**Fig. S3.** Elevated reactivity of a control sample LYM-518 to seven consecutive peptides within the 207-229 FlaB region. LYM-518 was classified as Lyme disease by the diagnostic model. Numbers 1-7 on the X axis represent the seven FlaB peptides. Reactivity is indicated on the Y axis. Yellow bars indicate average reactivity of 27 Lyme arthritis samples, blue bars indicate reactivity from LYM-518 and the red bars represent the average of 47 control samples. All samples were from the National Institutes of Health cohort.

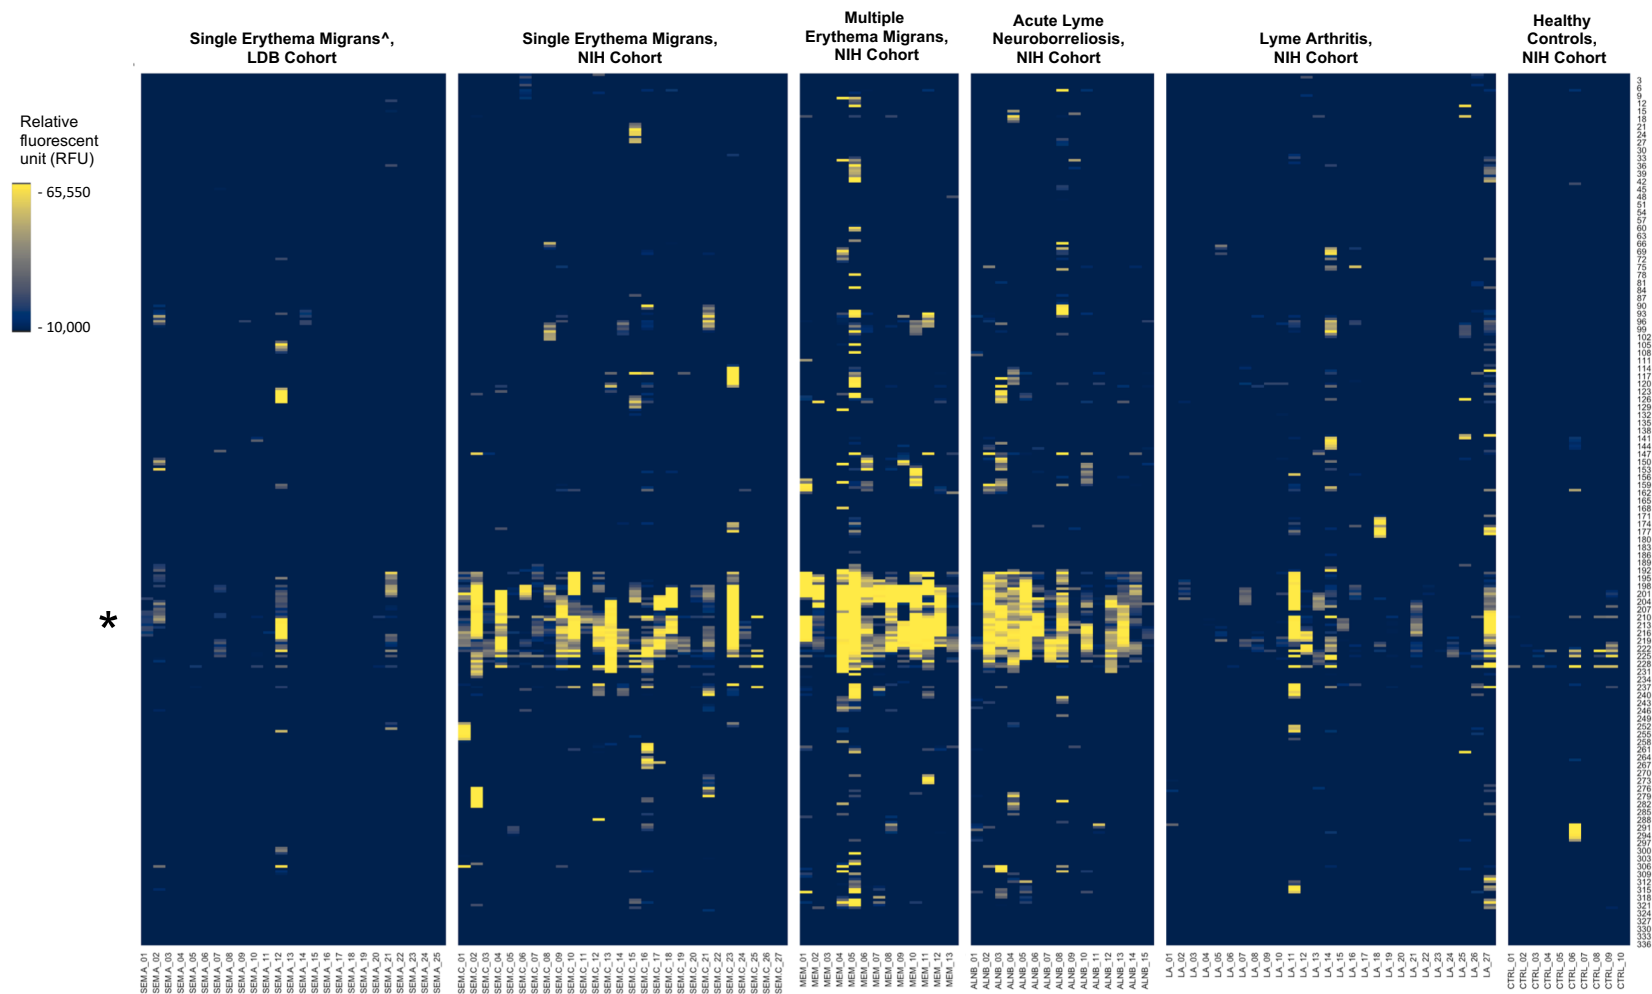

**Fig. S4.** IgM reactivity to FlaB peptides in the five sample types. The Y axis indicates the relative amino acid coordinates of the peptides within the full-length FlaB protein. Reactivity is shown in yellow. For clarity, only peptides with reactivity above 10,000 RFU are shown. Samples are indicated on the X axis. To illustrate baseline reactivity ten random control samples were selected and shown on the right. \* - indicates the highly immunoreactive region encompassing residues 191-231. ^ - includes only confirmed Lyme disease cases.
